# Supplementary material for: Mechanochemical defect engineering of HKUST-1 and impact of the resulting defects on carbon dioxide sorption and catalytic cyclopropanation
Source: PubMed Central journal article supplement — RSC Adv. 2020 May 27;10(34):19822–31. doi: 10.1039/c9ra10412g (PMC9054116; doi:10.1039/c9ra10412g), 2020-05-27

*Supplementary information*

**Mechanochemical defect engineering of HKUST-1 and impact of the resulting defects on carbon dioxide sorption and catalytic cyclopropanation**

*Timothy Steenhaut,\* Nicolas Grégoire, Gabriella Barozzino-Consiglio, Yaroslav Filinchuk\* and Sophie Hermans\**

---

Université catholique de Louvain, Institute of Condensed Matter and Nanosciences, Place Louis Pasteur 1/L4.01.03, 1348 Louvain-la-Neuve, Belgium  
E-mail: timothy.steenhaut@uclouvain.be; yaroslav.filinchuk@uclouvain.be; sophie.hermans@uclouvain.be

**A.** Optical microscopy morphological and size characterization of the reactants used for the syntheses and KHUST-1 single crystals

**Fig. S1.** PXRD of HKUST-1 materials

**Fig. S2.** FTIR spectra of reactants and obtained materials

**Fig. S3.** NH<sub>3</sub> TPD experiments

**Fig. S4.** TGA characterization of the HKUST-1 materials

**Fig. S5.** XPS characterization of the HKUST-1 materials

**Table S1.** CO<sub>2</sub> uptakes for various porous materials

**Fig. S6.** GC kinetic follow-up of cyclopropanation reaction

**Table S2.** Results of catalytic cyclopropanation

**B.** Details of the corrections applied on the raw data of the gravimetric CO<sub>2</sub> sorption results

**C.** Measurement and calculation of T<sub>1</sub> for styrene

A. Optical microscopy morphological and size characterization of the reactants used for the mechanochemical syntheses and of the HKUST-1 single crystals.

Sodium chloride

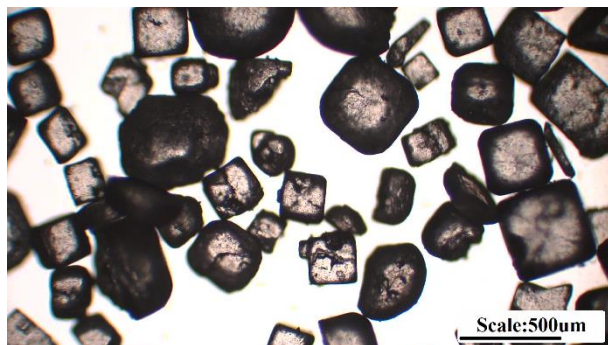

Trimesic acid

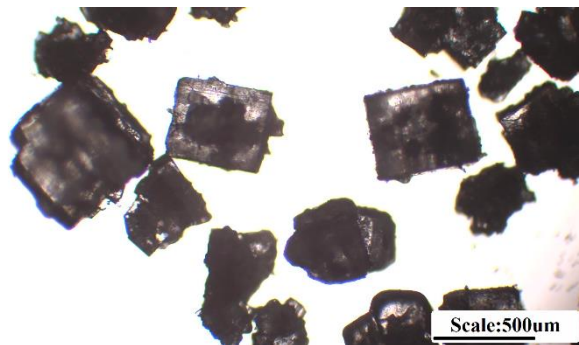

Copper (II) acetate monohydrate

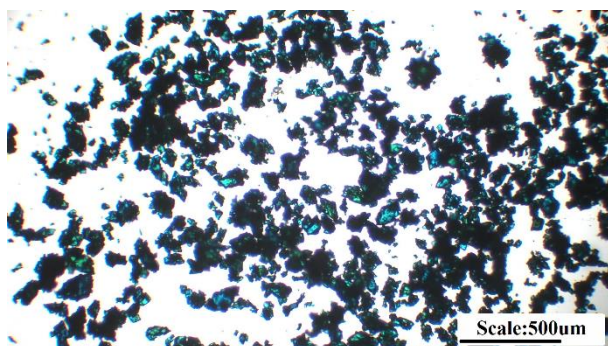

HKUST-1 single crystals

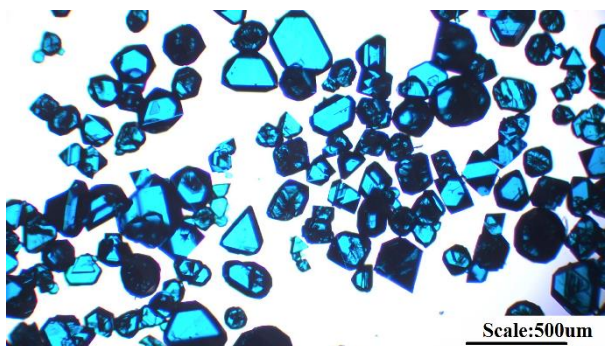

**Fig. S1.** X-ray powder patterns of the HKUST-1 materials obtained through the different synthesis pathways.

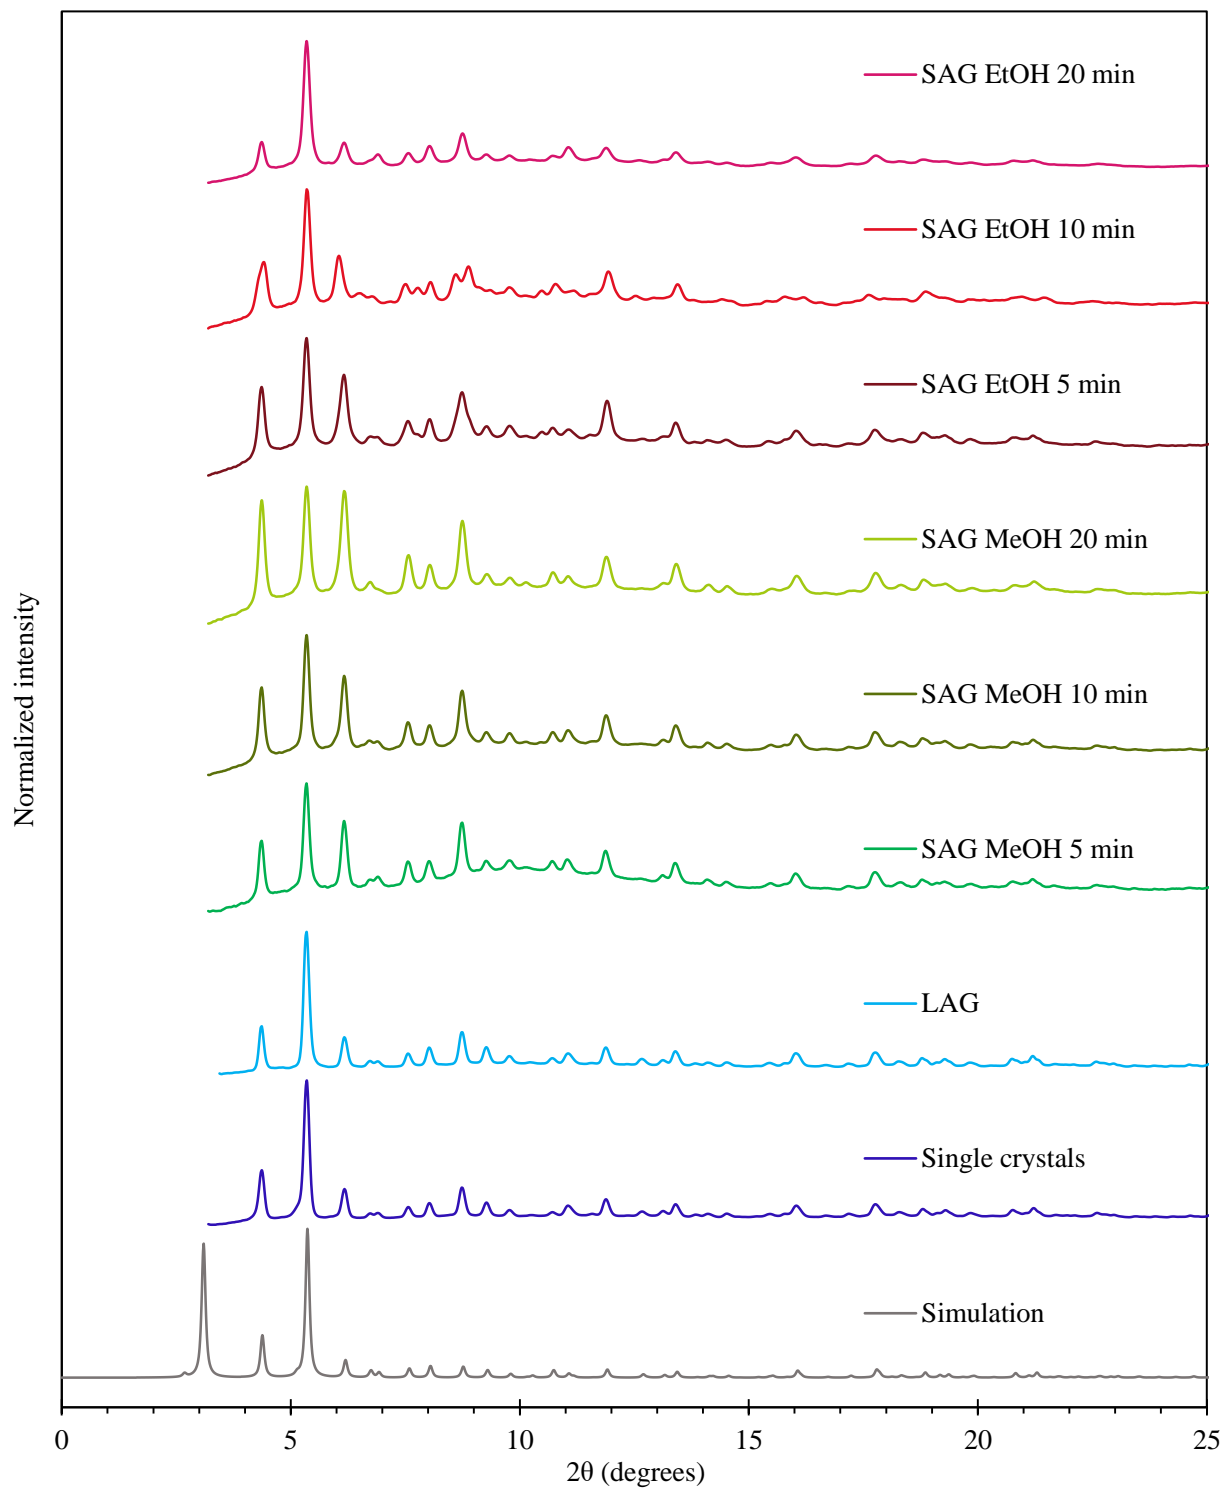

**- Fig. S1 -**

**Fig. S2. A.** FTIR spectra of copper (II) acetate monohydrate and trimesic acid.

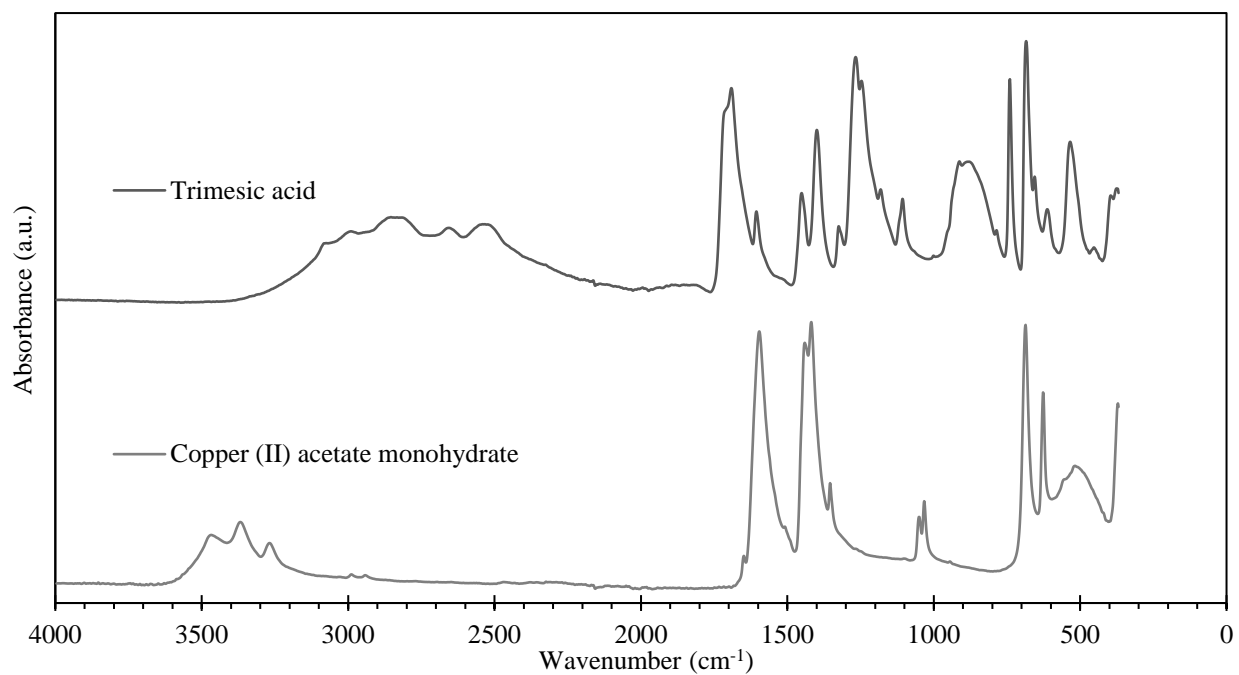

**Fig. S2. B.** FTIR spectra of as synthesized and activated (150°C, vacuum) samples of HKUST-1 synthesized by LAG. The  $\nu$  C–O bands of ethanol (arrow) disappear upon activation.

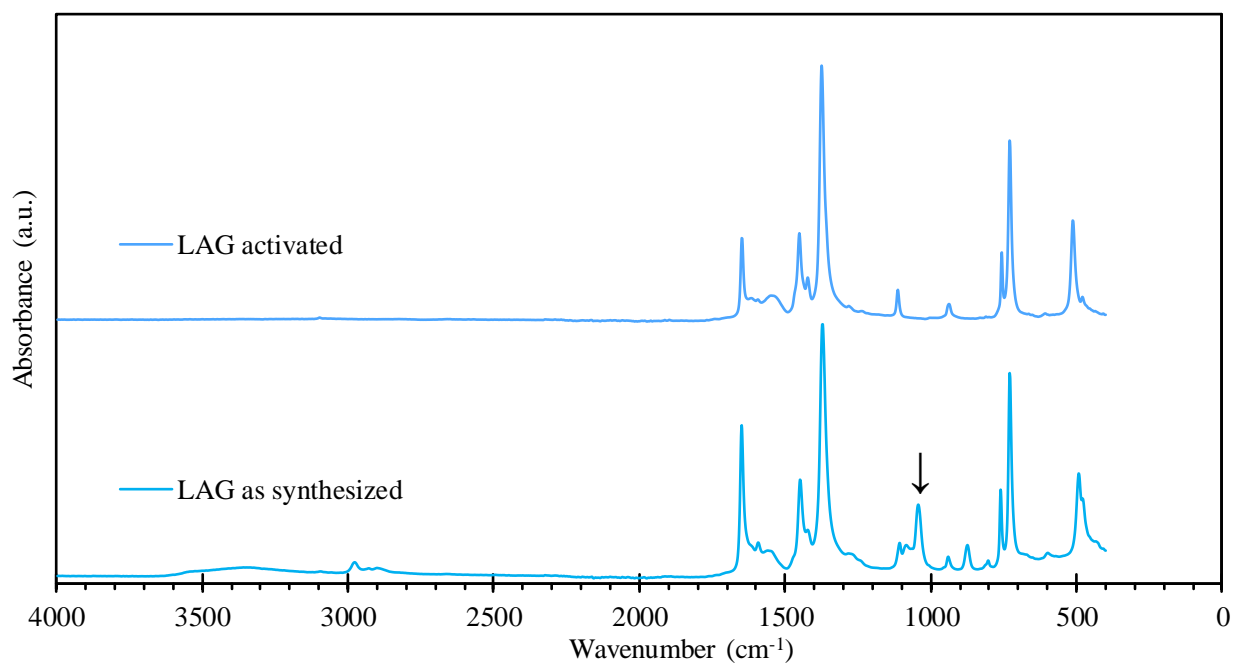

**Fig. S2. C.** FTIR spectra of activated (150°C, vacuum) HKUST-1 materials.

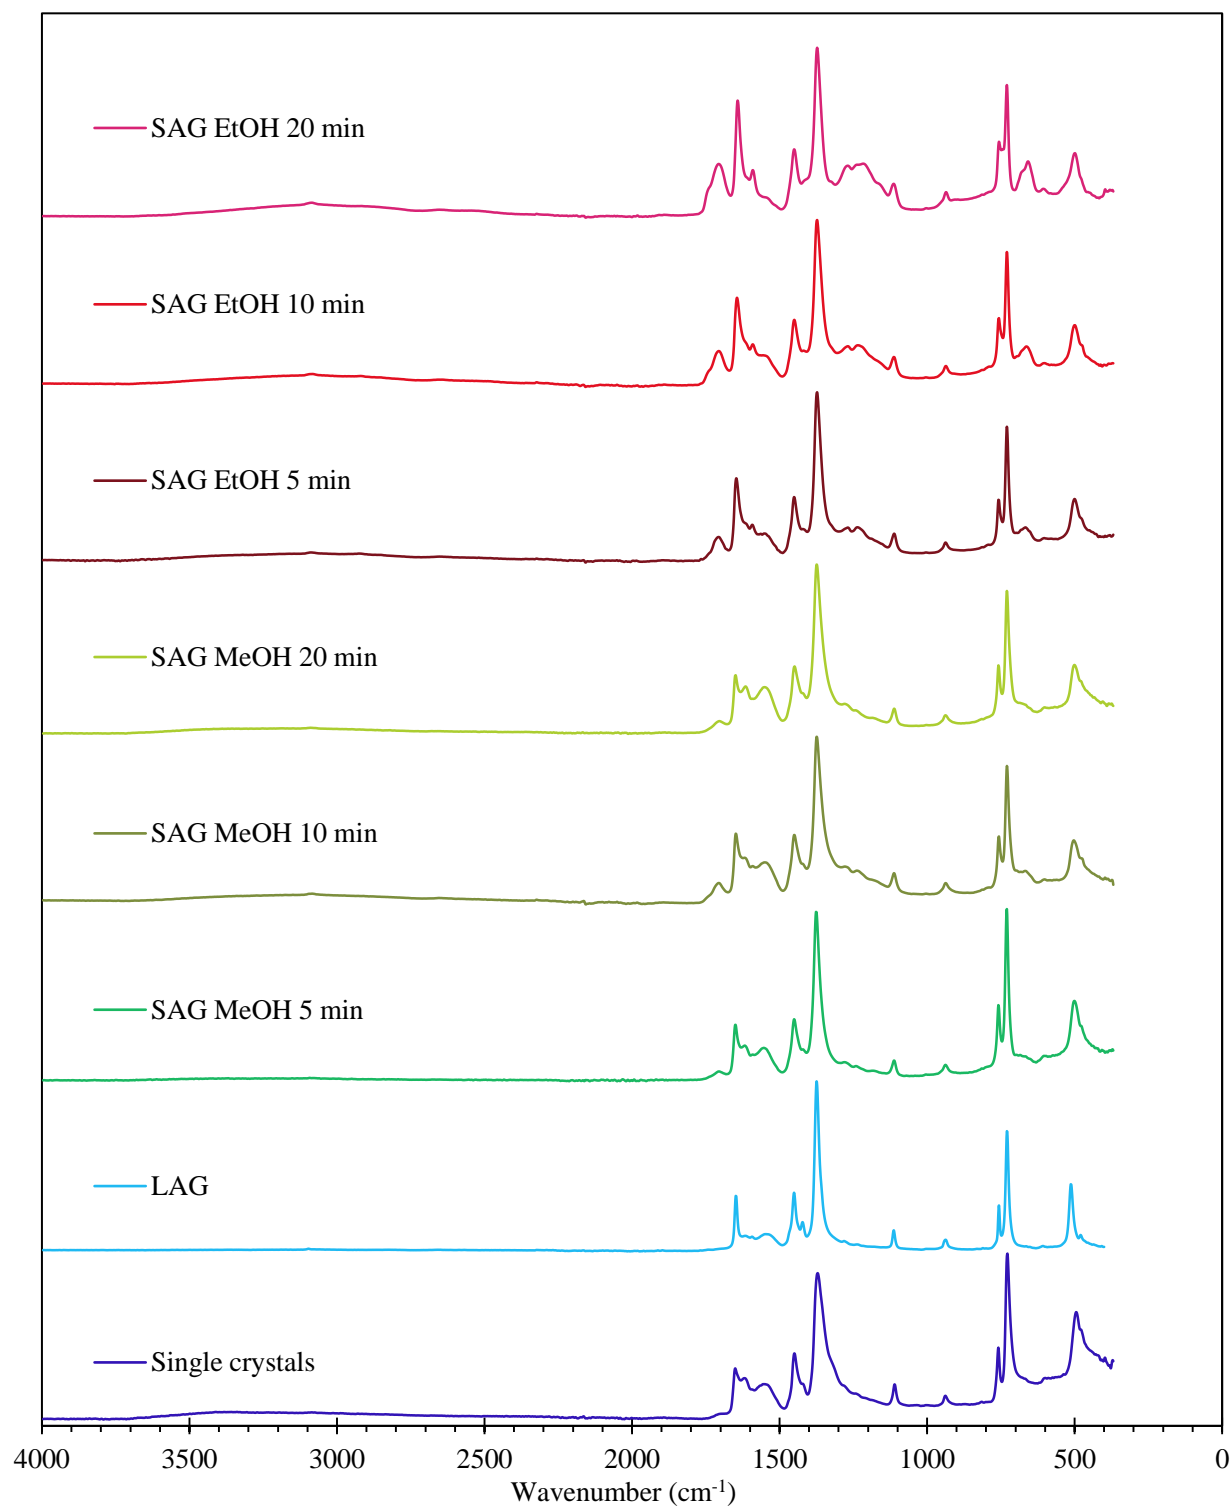

**- Fig. S2 -**

**Fig. S3.** NH<sub>3</sub> temperature-programmed desorption on HKUST materials prepared by SAG and treated with ethanol in comparison with the sample prepared by LAG.

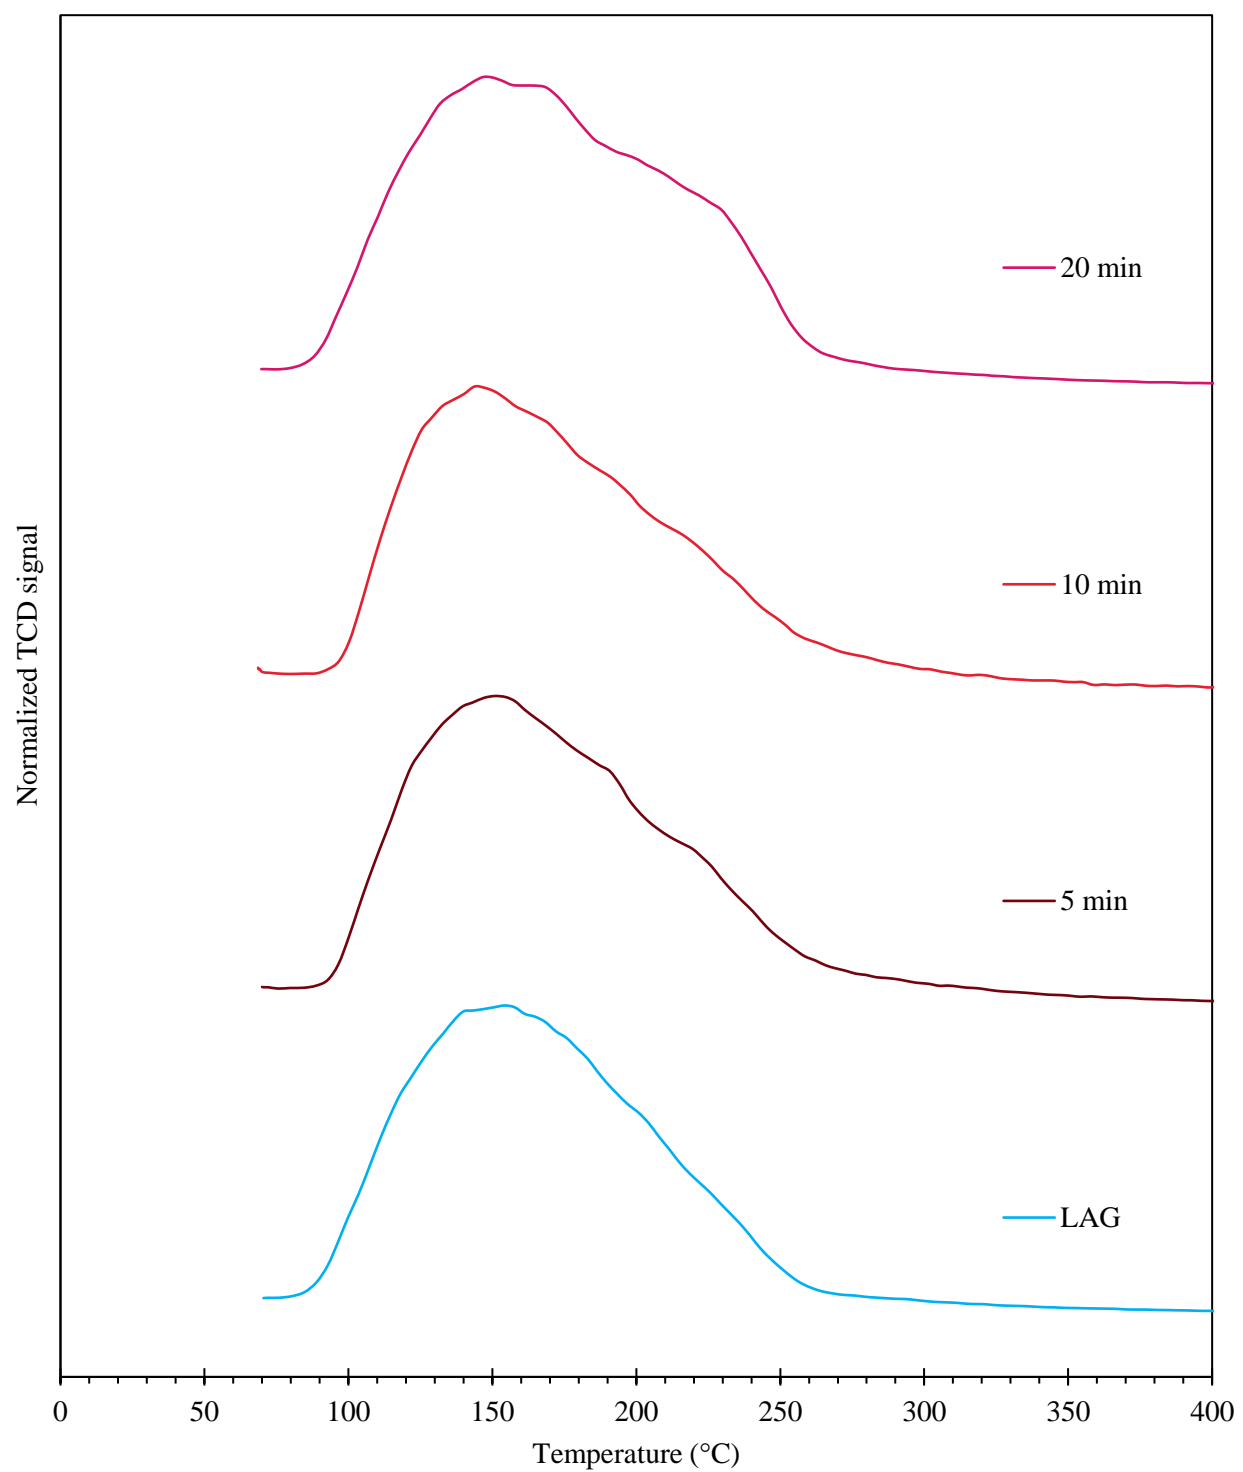

- Fig. S3 -

**Fig. S4. A1.** TGA analyses (under air) of HKUST-1 single crystals (as synthesized and powdered).

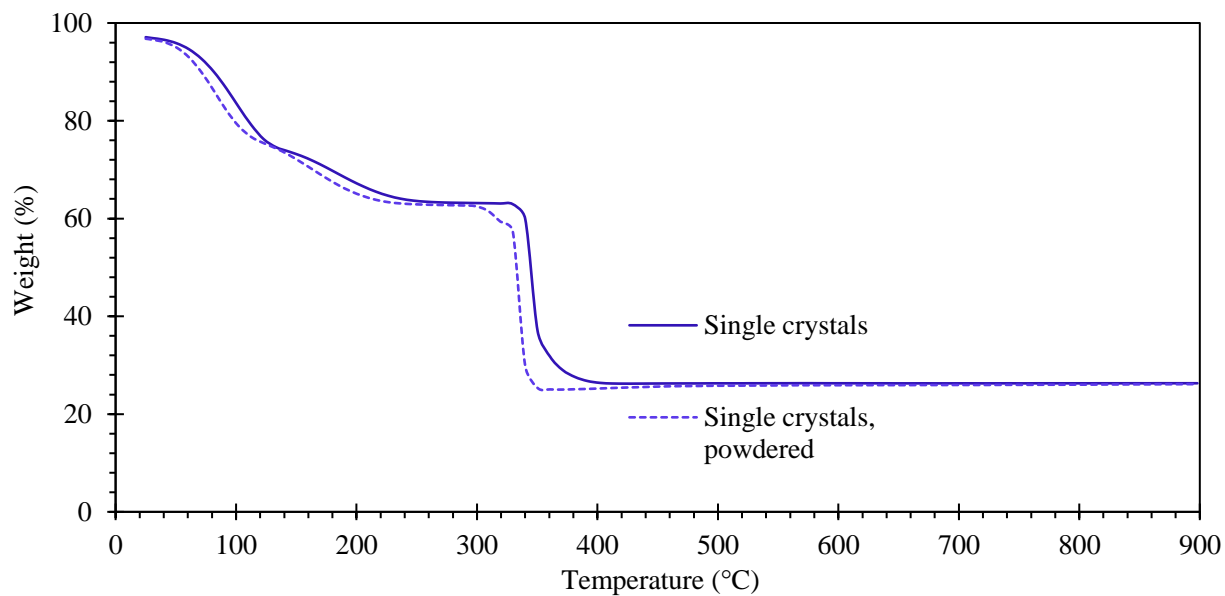

**Fig. S4. A2.** TGA analysis (under air) of HKUST-1 obtained by LAG.

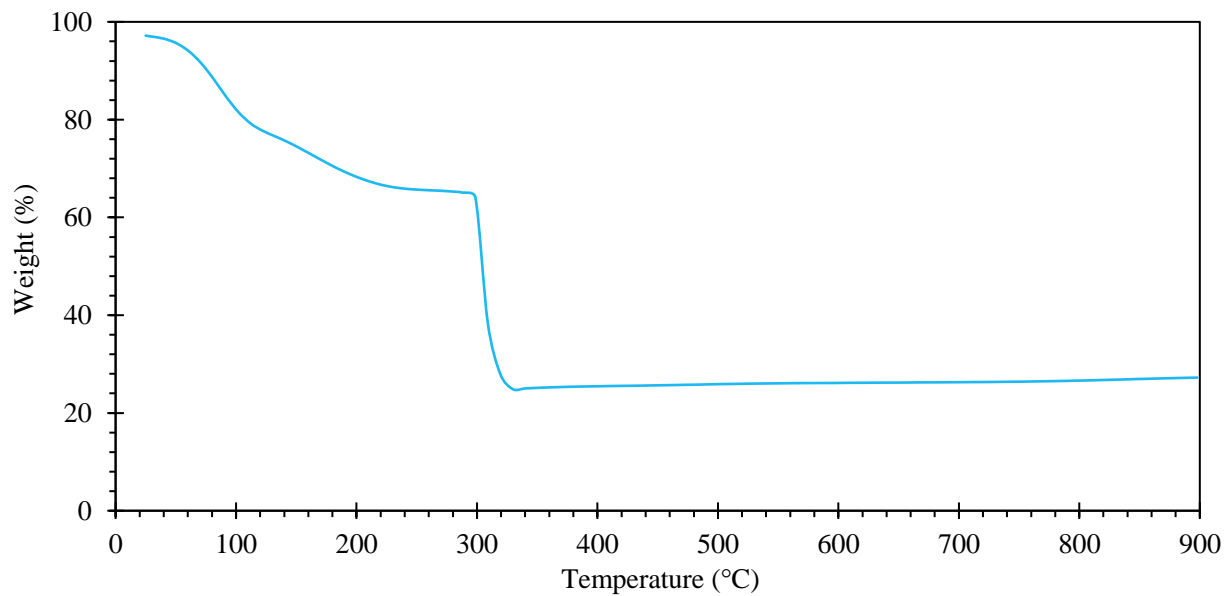

**Fig. S4. A3.** TGA analysis (under air) of HKUST-1 obtained by SAG (5 min) and treated with MeOH.

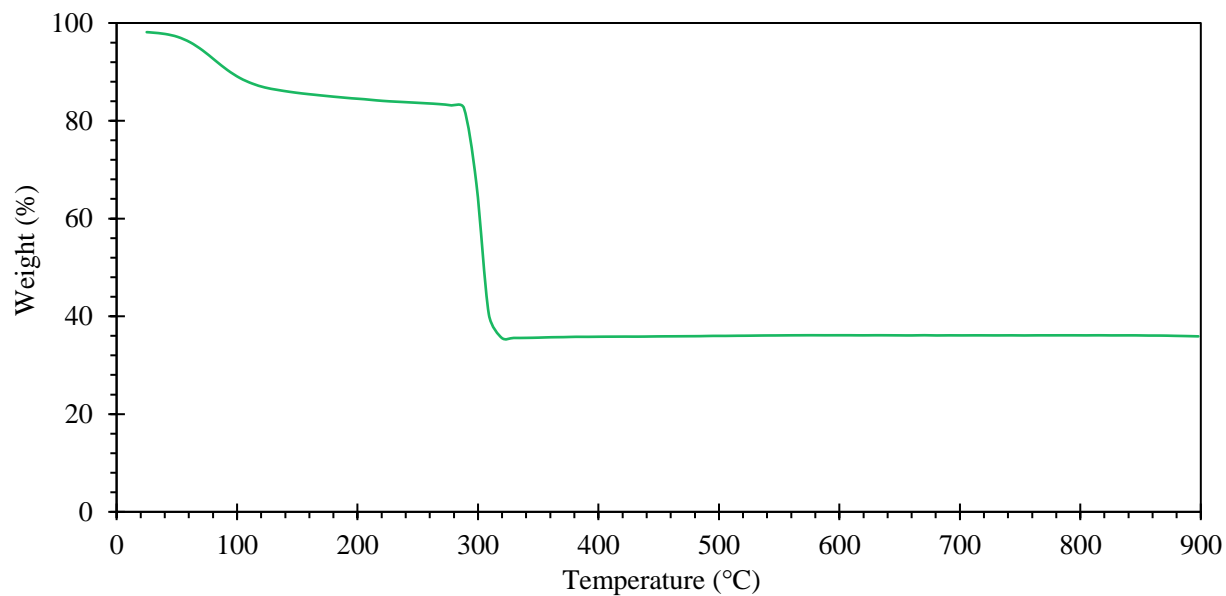

**Fig. S4. A4.** TGA analysis (under air) of HKUST-1 obtained by SAG (10 min) and treated with MeOH.

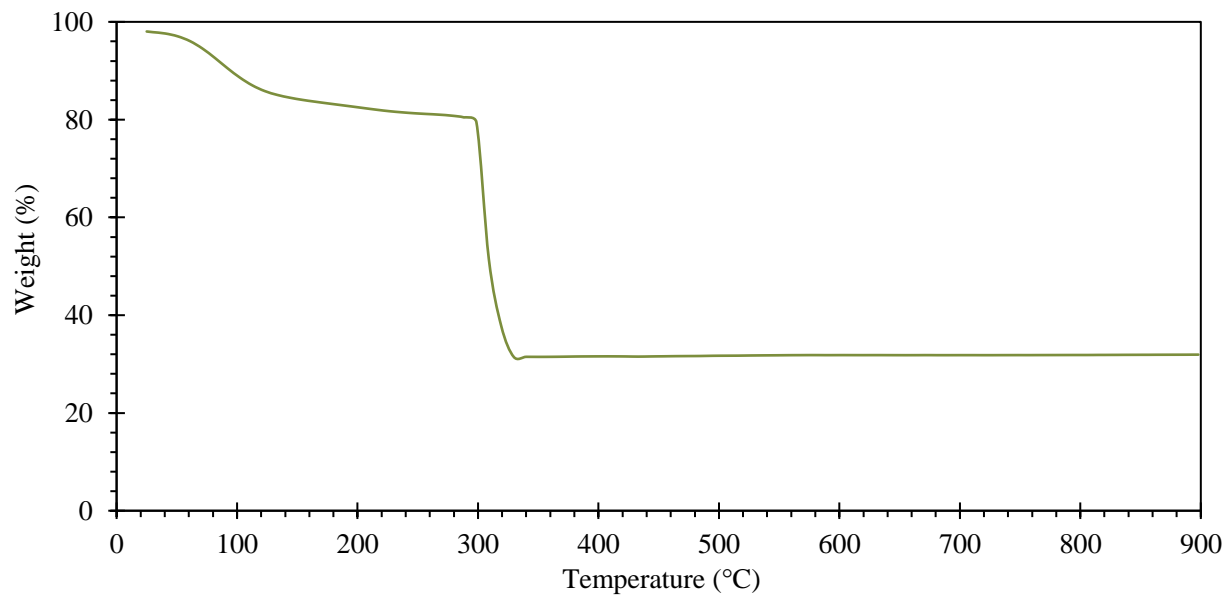



**Fig. S4. A5.** TGA analysis (under air) of HKUST-1 obtained by SAG (20 min) and treated with MeOH.

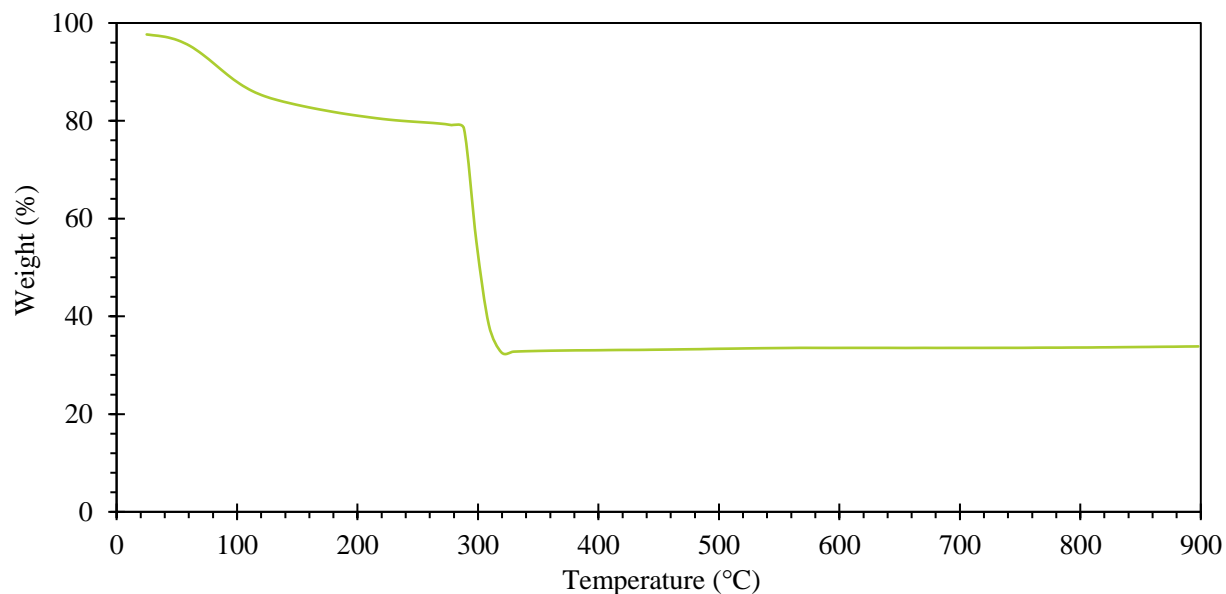

**Fig. S4. A6.** TGA analysis (under air) of HKUST-1 obtained by SAG (5 min) and treated with EtOH.

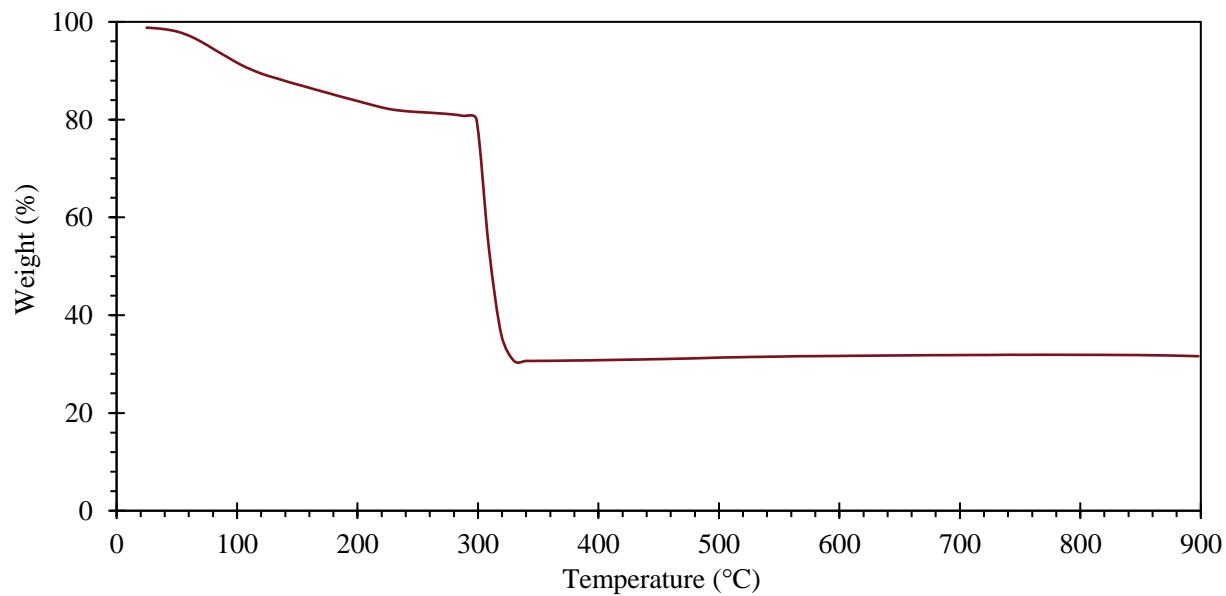

**Fig. S4. A7.** TGA analysis (under air) of HKUST-1 obtained by SAG (10 min) and treated with EtOH.

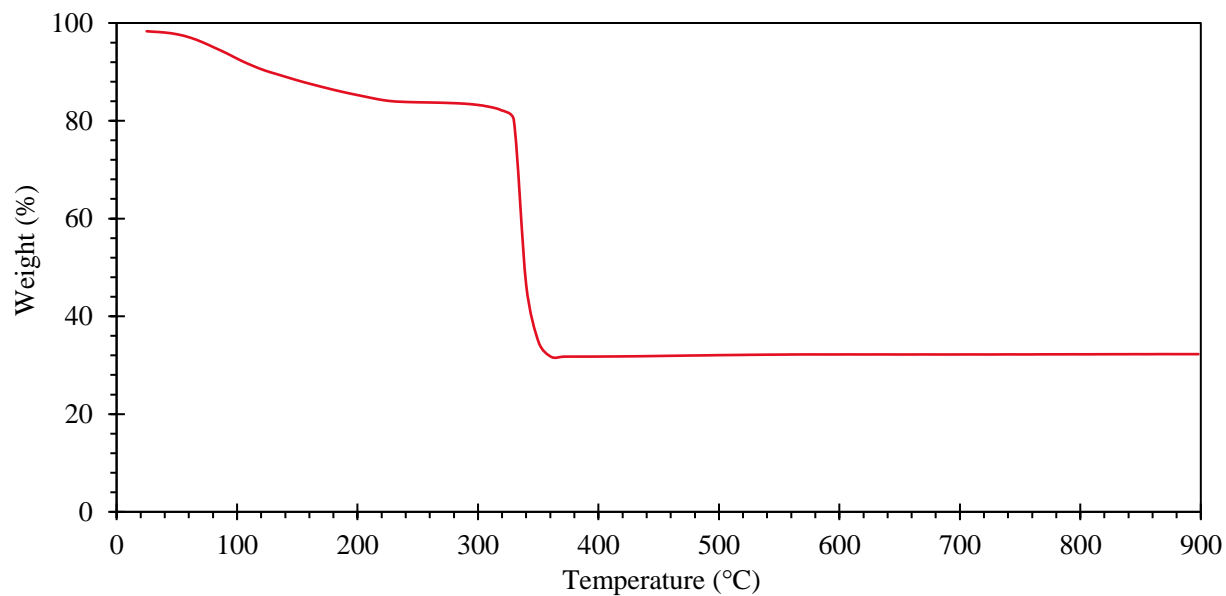

**Fig. S4. A8.** TGA analysis (under air) of HKUST-1 obtained by SAG (20 min) and treated with EtOH.

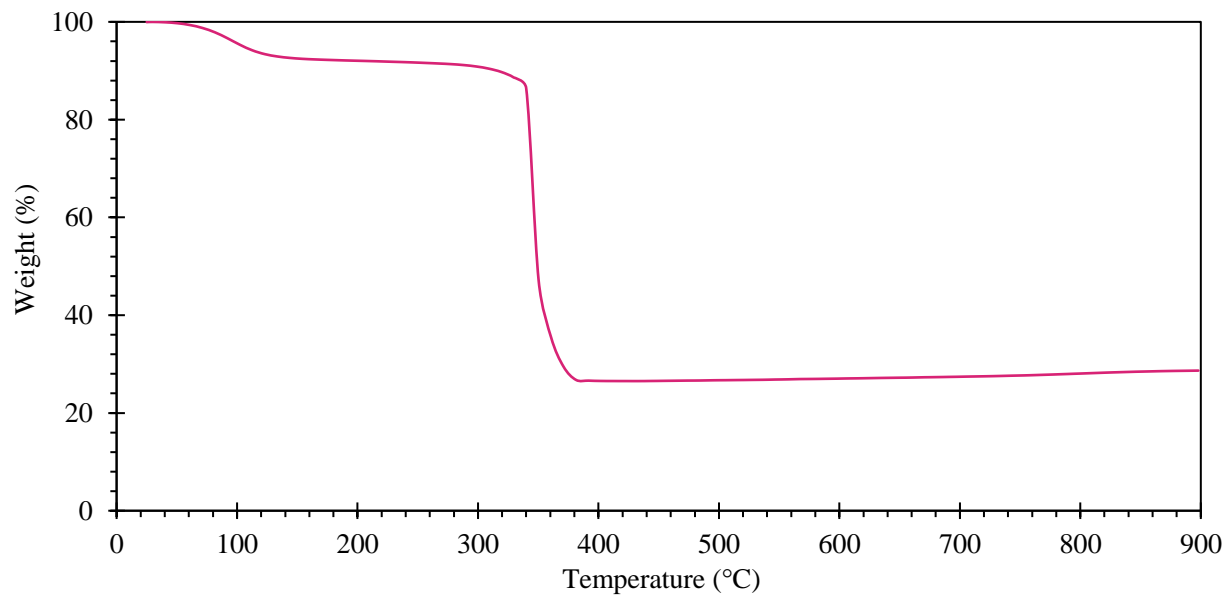

**Fig. S4. A9.** TGA analysis (under air) of trimesic acid.

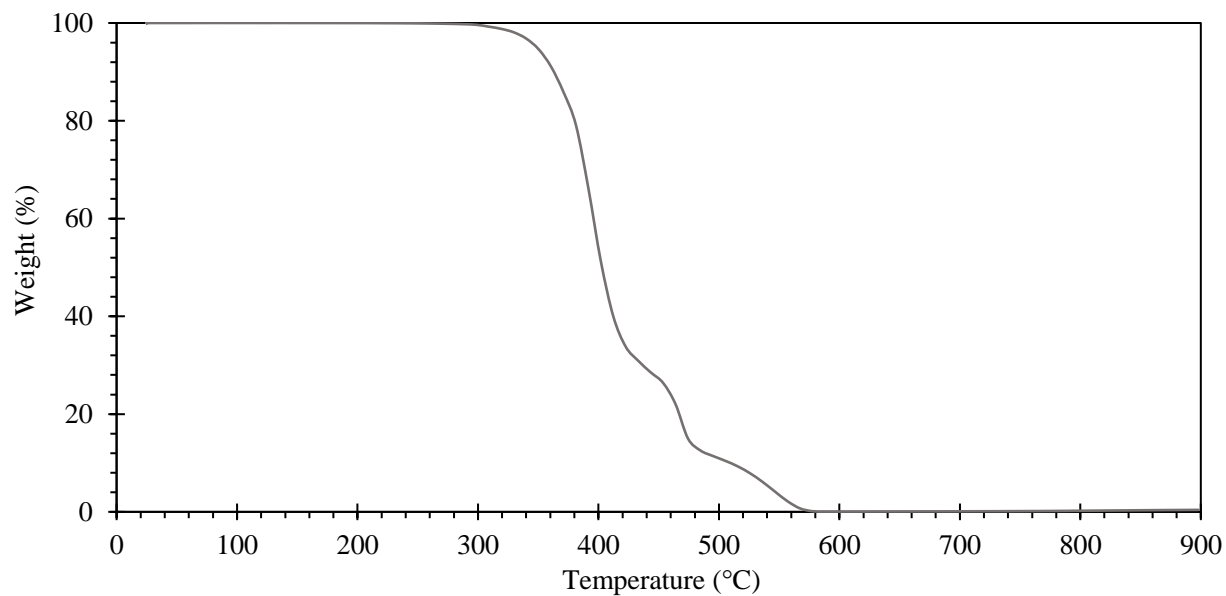

**Fig. S4. A10.** TGA analysis (under air) of copper (II) acetate.

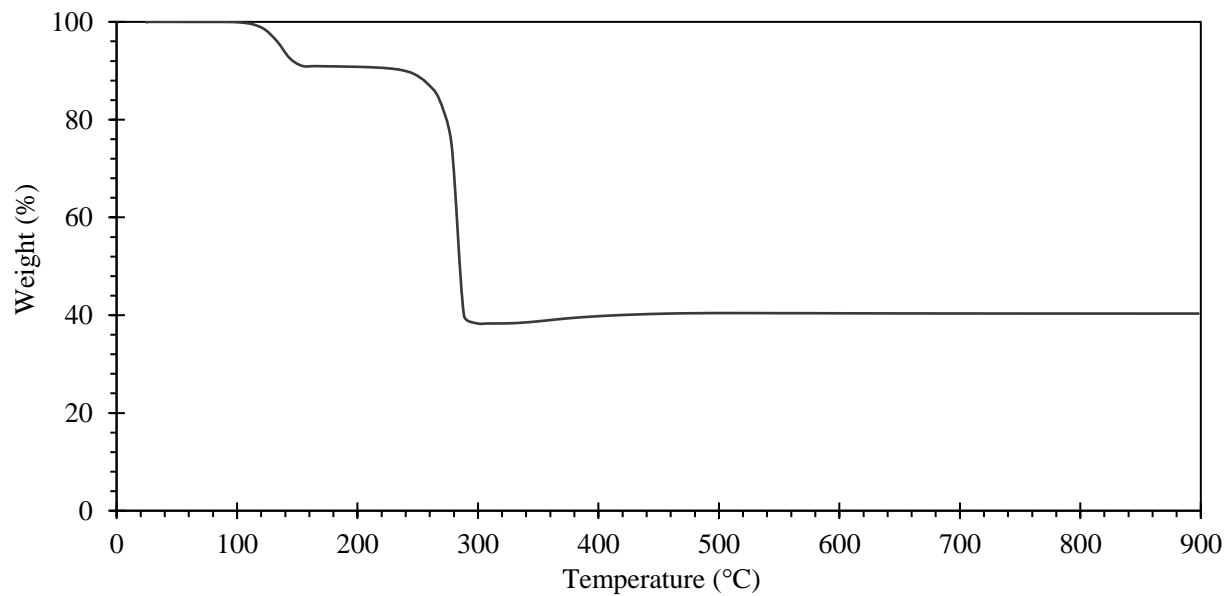

**Fig. S4. B.** Weight losses during decomposition of the HKUST-1 materials and calculated value for a perfect  $\text{Cu}_3\text{BTC}_2$  structure. Error bars of 1% are shown, corresponding to the typical error for TGA measurements.

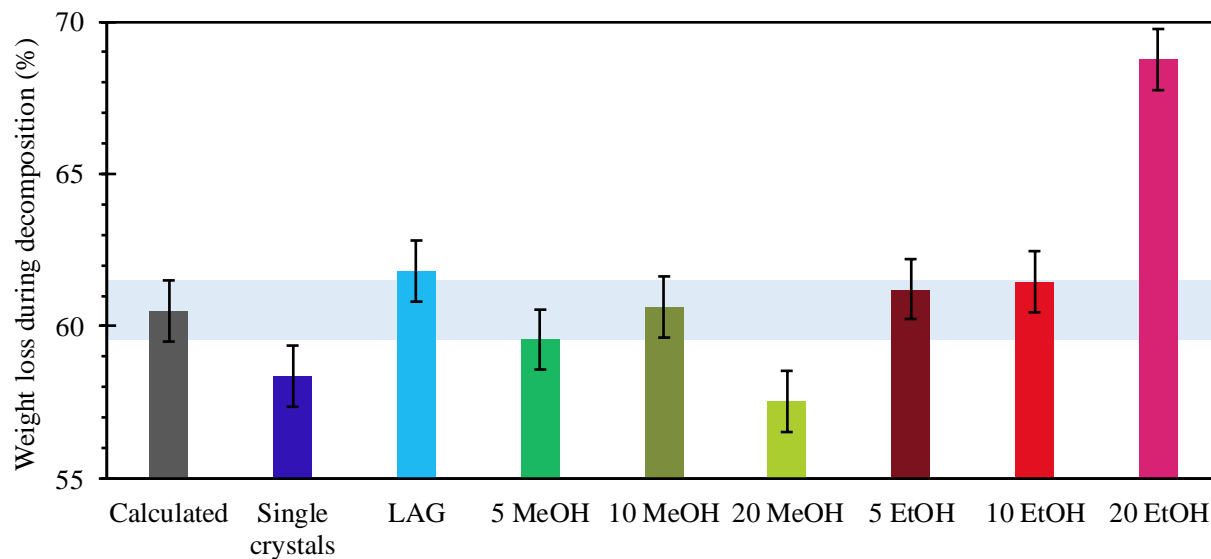

**Fig. S4. C.** Decomposition temperatures of the HKUST-1 materials determined by TGA under air.

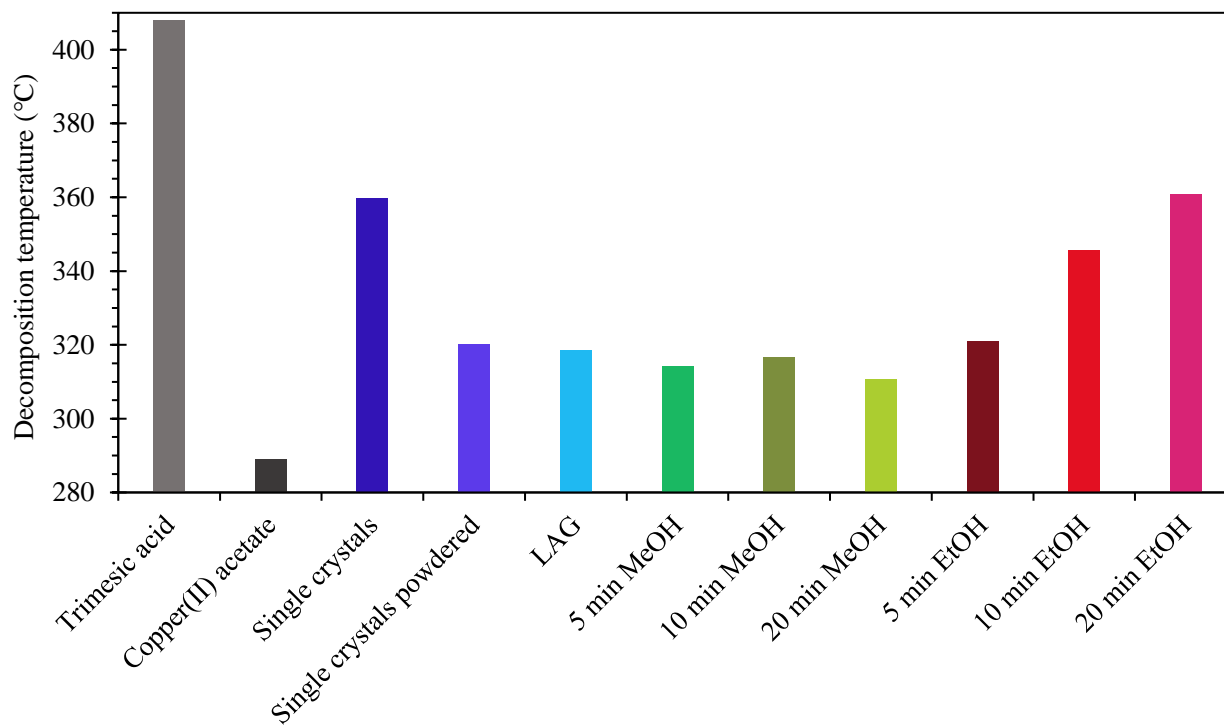

**Fig. S5. A.** Cu<sup>I</sup>/Cu<sup>II</sup> surface ratios determined by XPS for the HKUST-1 materials (*the single crystal samples were ground before analysis, the resulting data is thus not representative of the external surface composition whereas it is for all the other samples that were analyzed as such*).

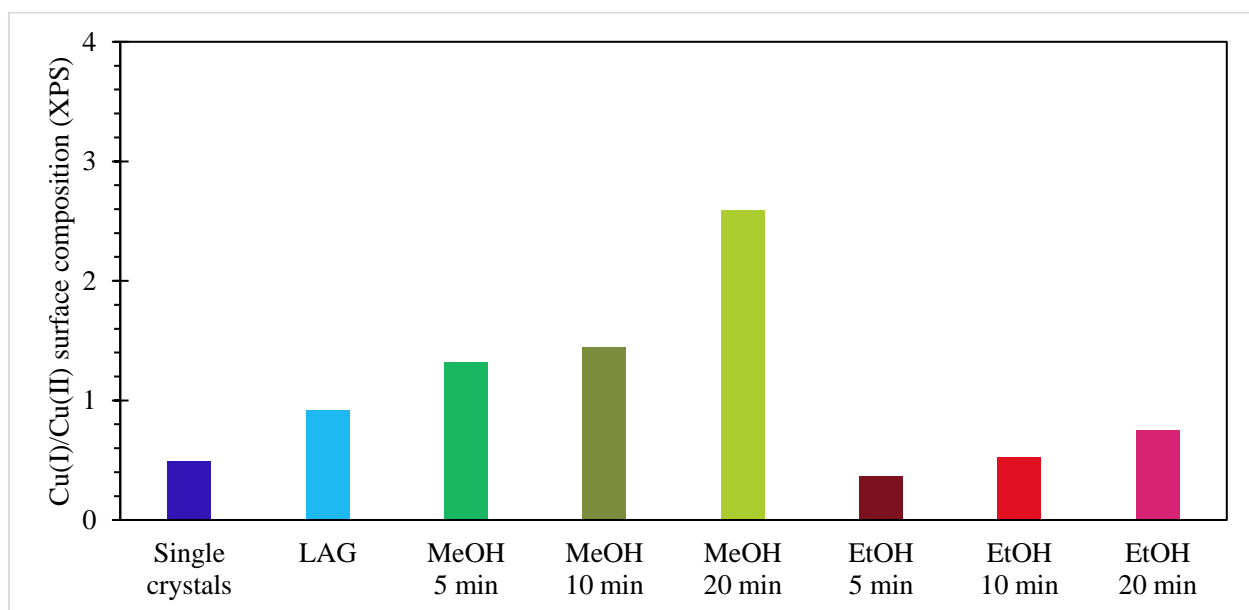

**Fig. S5. B.** Cu/O and Cu/C atomic ratios determined by XPS for the HKUST-1 materials.

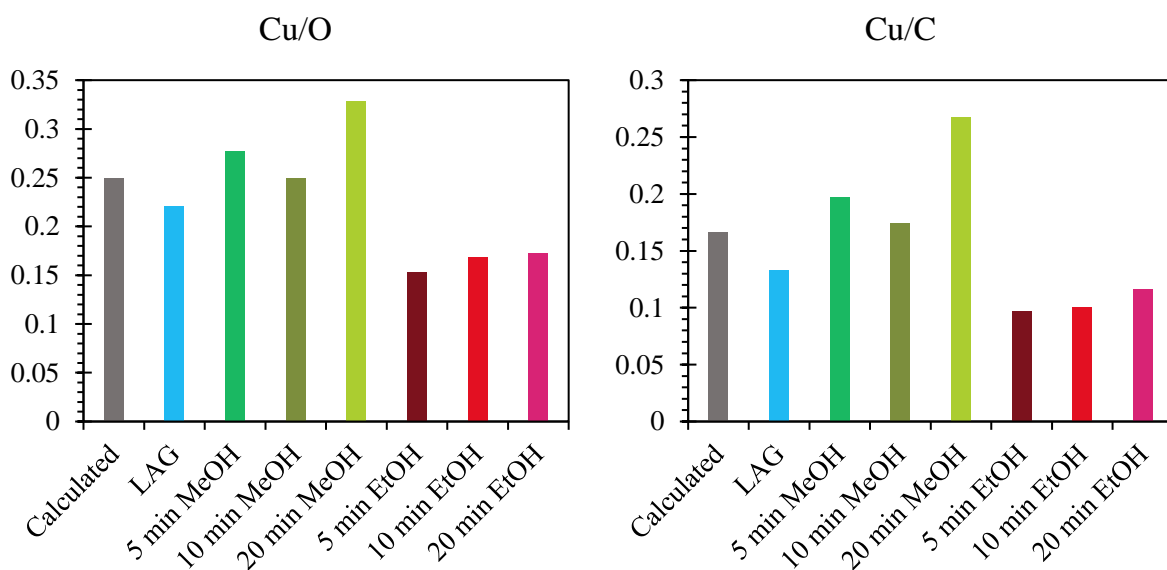

**Fig. S5. C.** Cu2p region of the XPS spectra of the HKUST-1 materials.

Attribution of deconvolution peaks:

Red: Cu(I) 2p<sub>3/2</sub>

Blue: Cu(II) 2p<sub>3/2</sub>

Green: Cu(II) 2p<sub>sat.</sub>

Yellow: Cu(II) 2p<sub>sat.</sub>

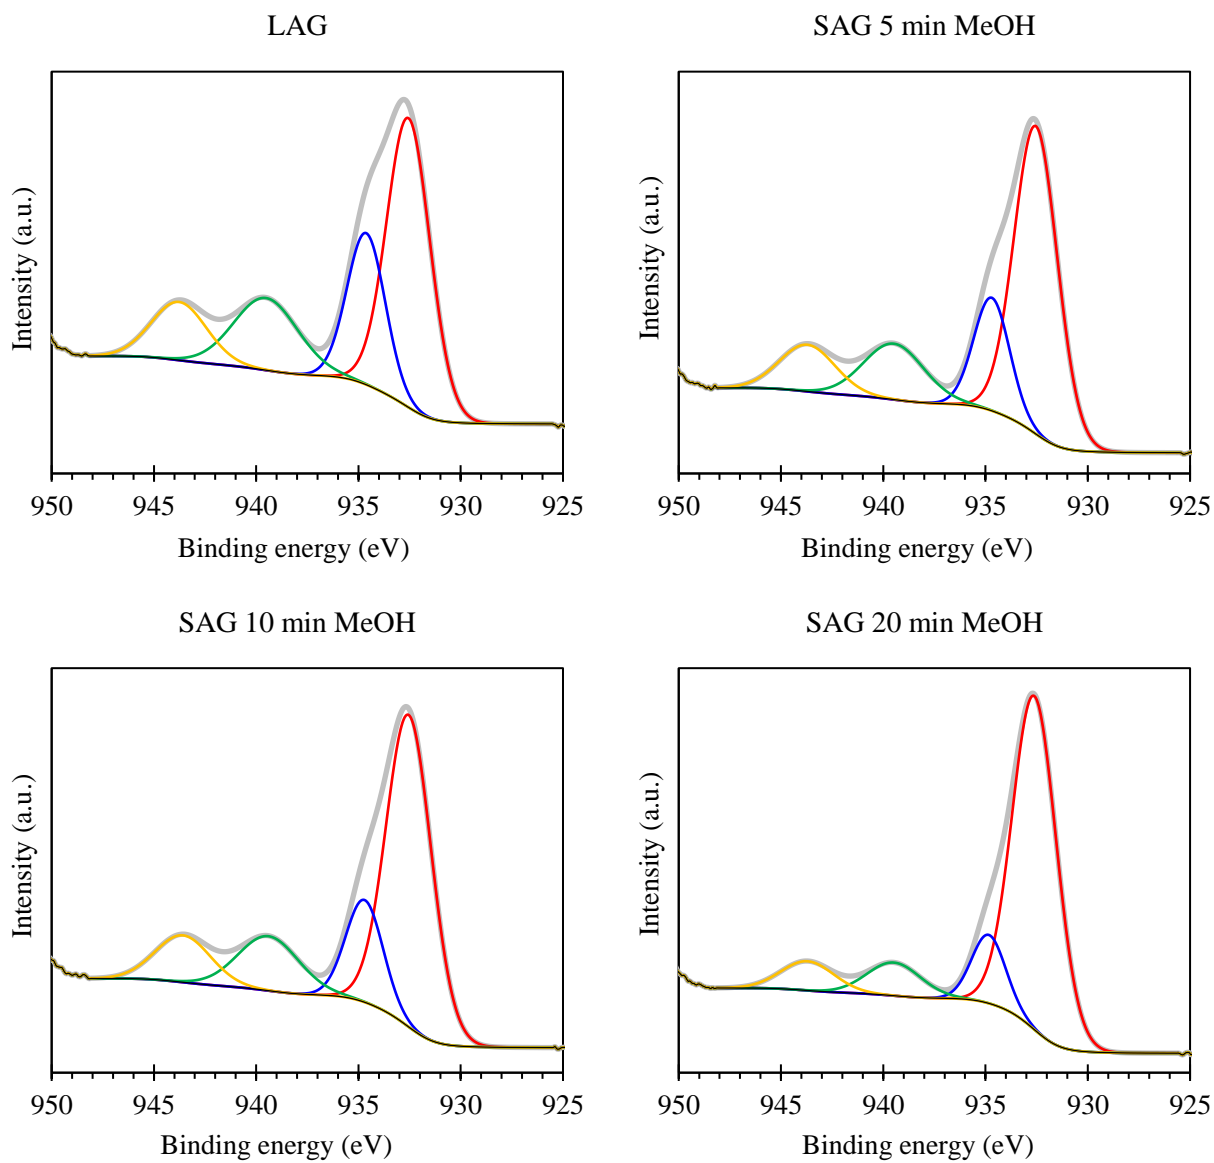

Attribution of deconvolution peaks:

Red: Cu(I)  $2p_{3/2}$

Blue: Cu(II)  $2p_{3/2}$

Green: Cu(II)  $2p_{sat.}$

Yellow: Cu(II)  $2p_{sat.}$

SAG 5 min EtOH

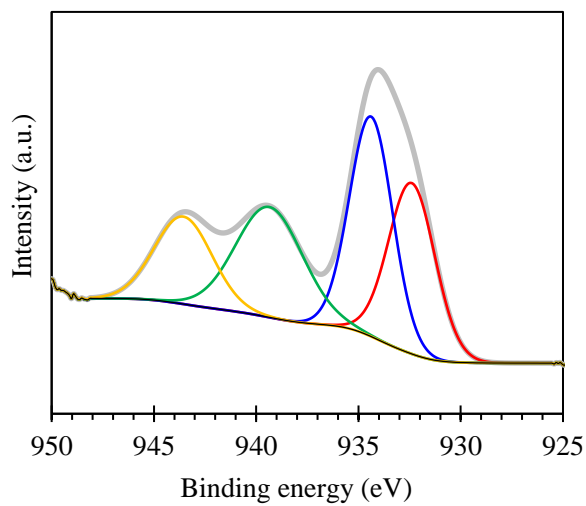

SAG 10 min EtOH

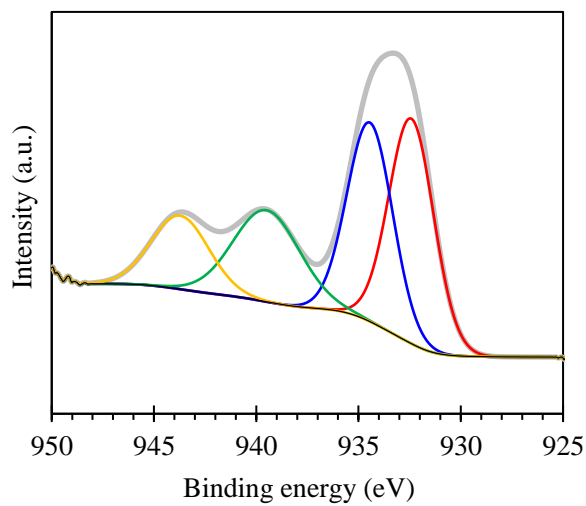

SAG 20 min EtOH

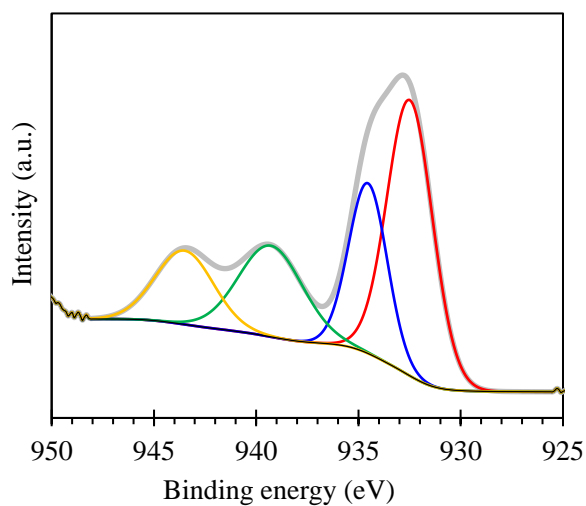

**Table S1.** CO<sub>2</sub> uptakes for illustrative porous materials.

| Type of material                        | Material                                                  | Uptake           |                   | T<br>(K)         | P        | Reference         |
|-----------------------------------------|-----------------------------------------------------------|------------------|-------------------|------------------|----------|-------------------|
|                                         |                                                           | (mmol/g)         | (weight %)        |                  |          |                   |
| MOF                                     | HKUST-1 SAG EtOH washed samples                           | 0.5 <sup>†</sup> | 2.0               | 300              | 1 bar    | <i>This study</i> |
|                                         | HKUST-1 single crystals                                   | 3.9 <sup>†</sup> | 17.0              | 300              | 1 bar    | <i>This study</i> |
|                                         | HKUST-1                                                   | 1.8 <sup>†</sup> | 8.1               | 300              | 1 bar    | 1                 |
|                                         | MIL-96                                                    | 3.7              | 16.3 <sup>†</sup> | 303              | 3.5 bar* | 2                 |
|                                         | ZIF-100                                                   | 1.0              | 4.2 <sup>†</sup>  | 298              | 850 torr | 2                 |
|                                         | MIL-102                                                   | 3.4              | 15.0 <sup>†</sup> | 304              | 3 MPa*   | 2                 |
|                                         | MIL-53                                                    | 7.5              | 33.0 <sup>†</sup> | 304              | 20 bar*  | 2                 |
|                                         | MIL-53                                                    | 10.0             | 44.0 <sup>†</sup> | 304              | 30 bar*  | 2                 |
|                                         | Mg-MOF-74                                                 | 6.8 <sup>†</sup> | 30.1              | 298              | 1 bar    | 2                 |
|                                         | Ni-MOF-74                                                 | 4.4 <sup>†</sup> | 19.4              | 298              | 1 bar    | 2                 |
|                                         | MIL-100(Cr)                                               | 2.2 <sup>†</sup> | 9.5               | 298              | 1 bar    | 2                 |
|                                         | HKUST-1                                                   | 2.9 <sup>†</sup> | 12.8              | 313              | 1 bar    | 2                 |
|                                         | MOF and corresponding post-synthetic modified derivatives | MIL-101          | 0.3               | 1.5 <sup>†</sup> | 298      | 0.15 bar          |
| MIL-101-PEI (polyethyleneimine)         |                                                           | 4.2              | 18.5 <sup>†</sup> | 298              | 0.15 bar | 2                 |
| Mg-MOF-74                               |                                                           | 5.3 <sup>†</sup> | 23.4              | 298              | 760 torr | 2                 |
| Mg-MOF-74-TEPA (tetraethylenepentamine) |                                                           | 6.1 <sup>†</sup> | 26.9              | 298              | 760 torr | 2                 |
| MOF composite materials                 | HKUST-1                                                   | 6.9              | 30.1 <sup>†</sup> | 273 <sup>‡</sup> | 1 bar    | 2                 |
|                                         | GO@HKUST-1                                                | 9.0              | 39.7 <sup>†</sup> | 273 <sup>‡</sup> | 1 bar    | 2                 |
|                                         | ZIF-8                                                     | 2.2              | 9.6 <sup>†</sup>  | 273 <sup>‡</sup> | 1 bar    | 2                 |
|                                         | ZIF-8/CNT                                                 | 2.2              | 9.7 <sup>†</sup>  | 273 <sup>‡</sup> | 1 bar    | 2                 |
| Activated carbon                        | from African palm shell                                   | 4.4              | 19.4 <sup>†</sup> | 298              | n.a.     | 3                 |
|                                         | from almond shell                                         | 2.1              | 9.2 <sup>†</sup>  | 298              | n.a.     | 3                 |
|                                         | from rice husk                                            | 1.3              | 5.7 <sup>†</sup>  | 298              | n.a.     | 3                 |
|                                         | from cotton stalk treated with NH <sub>3</sub> at 900°C   | 1.8              | 7.9 <sup>†</sup>  | 298              | n.a.     | 3                 |
|                                         | Filtrisorb 400                                            | 11.1             | 48.9 <sup>†</sup> | 318              | 16 MPa*  | 4                 |
|                                         | Filtrisorb 400                                            | 8.0              | 35.2 <sup>†</sup> | 318              | 5 MPa*   | 4                 |
|                                         | Fibers (ACF A10)                                          | 4.4 <sup>†</sup> | 19.5 <sup>†</sup> | 273 <sup>‡</sup> | 100 kPa  | 5                 |

<sup>†</sup> Converted values. \* Pressures well above 1 bar and should thus not be directly compared to the results of this study. <sup>‡</sup> Temperatures well below 300 K and should thus not be directly compared to the results of our study. n.a. = non available.

1 Y. Chen, X. Mu, E. Lester and T. Wu, *Prog. Nat. Sci. Mater. Int.*, 2018, **28**, 584–589.

2 T. Ghanbari, F. Abnisa and W. M. A. Wan Daud, *Sci. Total Environ.*, 2020, **707**, 135090.

3 A. Mukherjee, J. A. Okolie, A. Abdelrasoul, C. Niu and A. K. Dalai, *J. Environ. Sci. (China)*, 2019, **83**, 46–63.

4 Y. Gensterblum, P. van Hemert, P. Billemon, A. Busch, D. Charrière, D. Li, B. M. Krooss, G. de Weireld, D. Prinz and K. H. A. A. Wolf, *Carbon N. Y.*, 2009, **47**, 2958–2969.

5 Y. Nakahigashi, H. Kanoh, T. Ohba, M. Baba, Y. Hattori, N. Inoue and M. Morimoto, *Adsorpt. Sci. Technol.*, 2012, **30**, 621–626.



**Fig. S6.** GC kinetic follow-up of the concentration of styrene, *cis* and *trans* cyclopropane and diethyl maleate and fumarate during the catalytic cyclopropanation of styrene with EDA using the LAG synthesized HKUST-1 material as catalyst.

The plot was obtained by using the following equation:

$$N_C = \frac{I_X}{I_{\text{styrene}} + I_{\text{trans-cyclopropane}} + I_{\text{cis-cyclopropane}}}$$

In which  $N_C$  is the normalized concentration of the species  $X$ ,  $I_X$  is the measured intensity of the GC signal of compound  $X$ , and  $I_{\text{styrene}}$ ,  $I_{\text{trans-cyclopropane}}$  and  $I_{\text{cis-cyclopropane}}$  are the intensities of the peaks observed for styrene, *trans*-cyclopropane and *cis*-cyclopropane respectively.

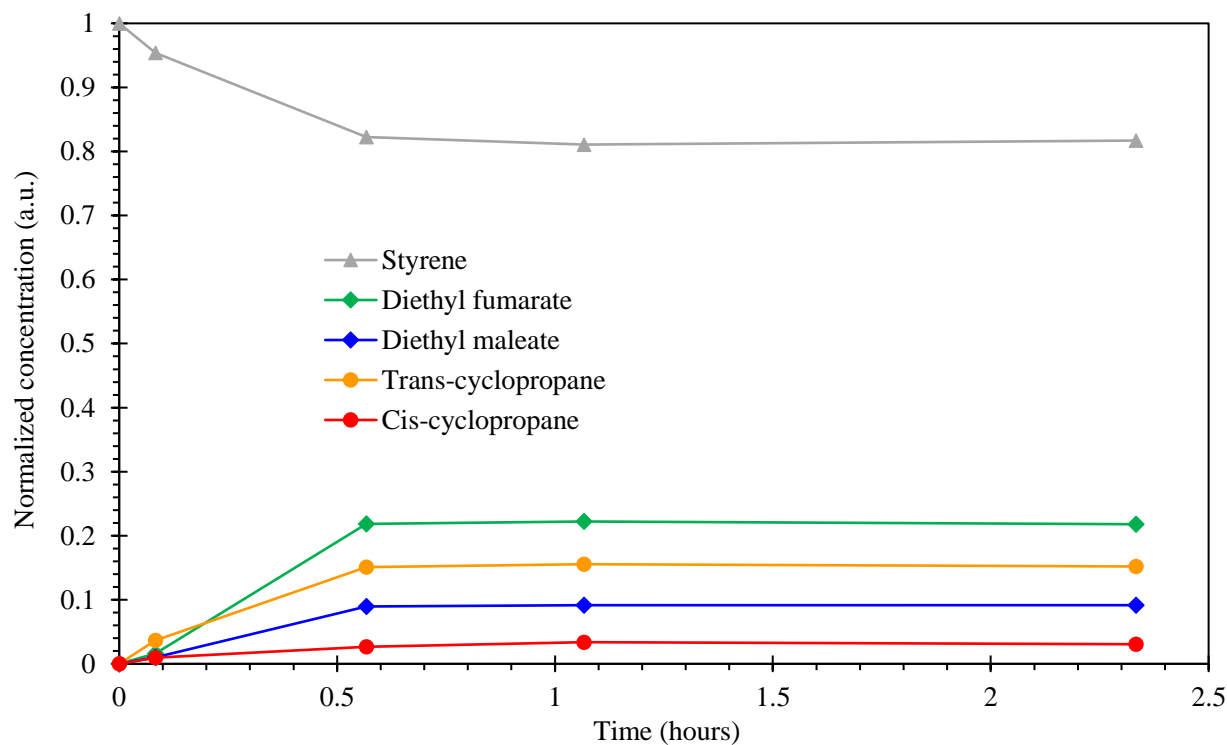

**Table S2.** Conversions and selectivity of the reaction of styrene with EDA obtained with the different tested catalysts.

| Material        | Conversion (%) |                 |                | Selectivity (%)          |                            |
|-----------------|----------------|-----------------|----------------|--------------------------|----------------------------|
|                 | EDA            | Diethylfumarate | Diethylmaleate | <i>Cis</i> -cyclopropane | <i>Trans</i> -cyclopropane |
| None            | 0              | -               | -              | -                        | -                          |
| Single crystals | 92.6           | 36.1            | 19.8           | 13.0                     | 31.1                       |
| LAG             | 100            | 26.0            | 10.8           | 20.4                     | 42.9                       |
| 5 min MeOH      | 7.2            | 49.0            | 30.2           | 6.3                      | 14.6                       |
| 10 min MeOH     | 15.2           | 38.7            | 28.6           | 13.4                     | 19.3                       |
| 20 min MeOH     | 100            | 25.7            | 12.9           | 20.6                     | 40.8                       |
| 5 min EtOH      | 1.9            | *               | *              | *                        | *                          |
| 10 min EtOH     | 0              | -               | -              | -                        | -                          |
| 20 min EtOH     | 0              | -               | -              | -                        | -                          |

\* The conversion obtained for the 5 min EtOH sample is too low to calculate the selectivity with acceptable accuracy.

**B. Corrections applied on the raw data of the gravimetric CO<sub>2</sub> sorption and reproducibility test.**

Blank measurement (automatically corrected by TGA software)

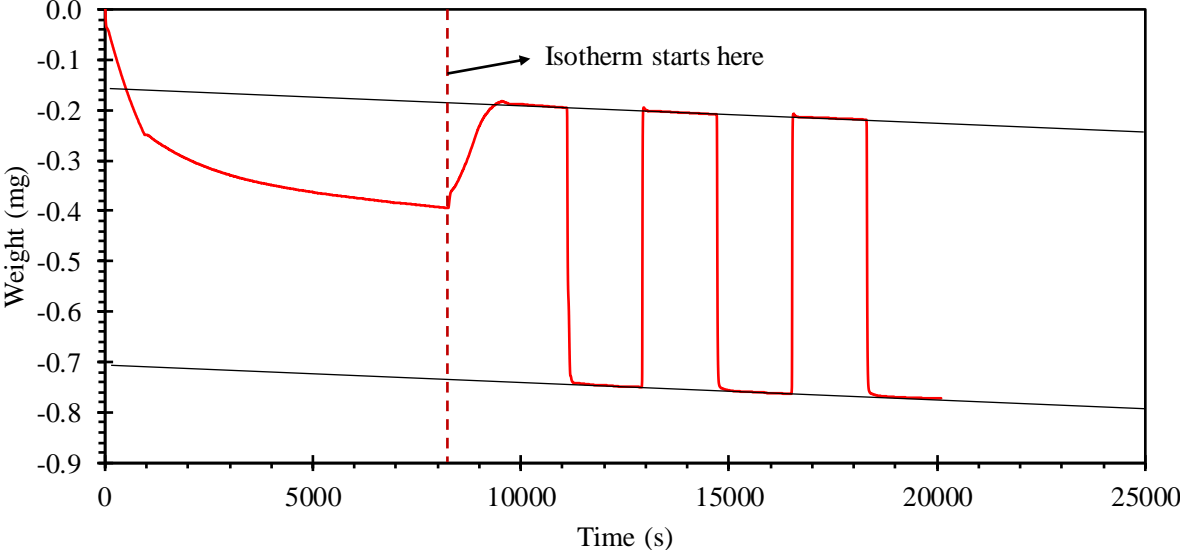

Raw data with automatic blank correction from TGA software for the 5 min EtOH sample and indication of the applied corrections

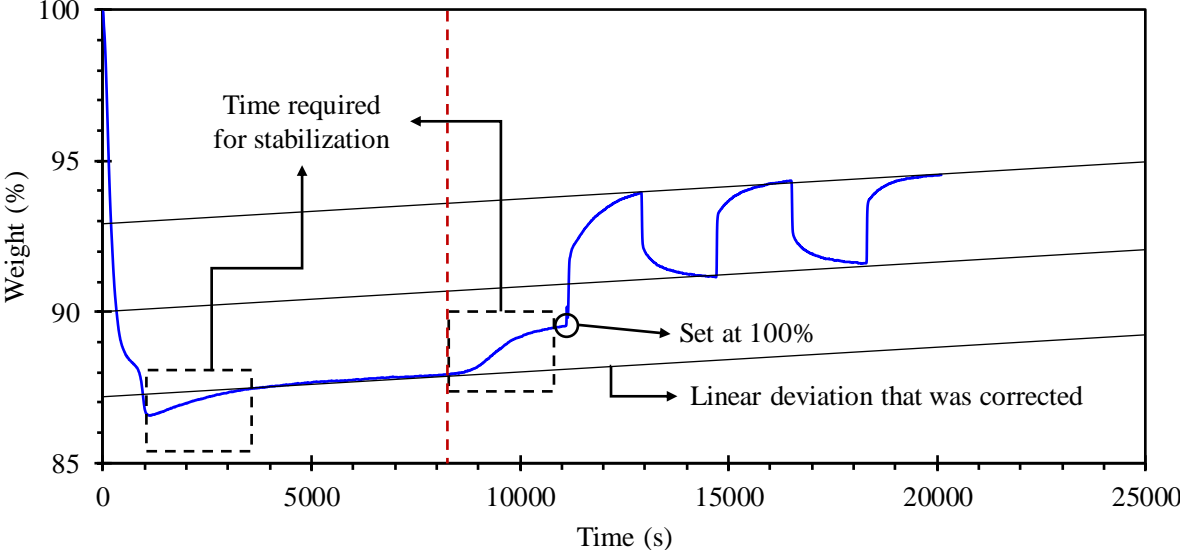

Reproducibility test, showing two measurements of HKUST-1 LAG sample (red and blue curves) with the applied corrections, the grey zone around the curves are error bars set at 1%, which is the typical value for error in TGA measurement.

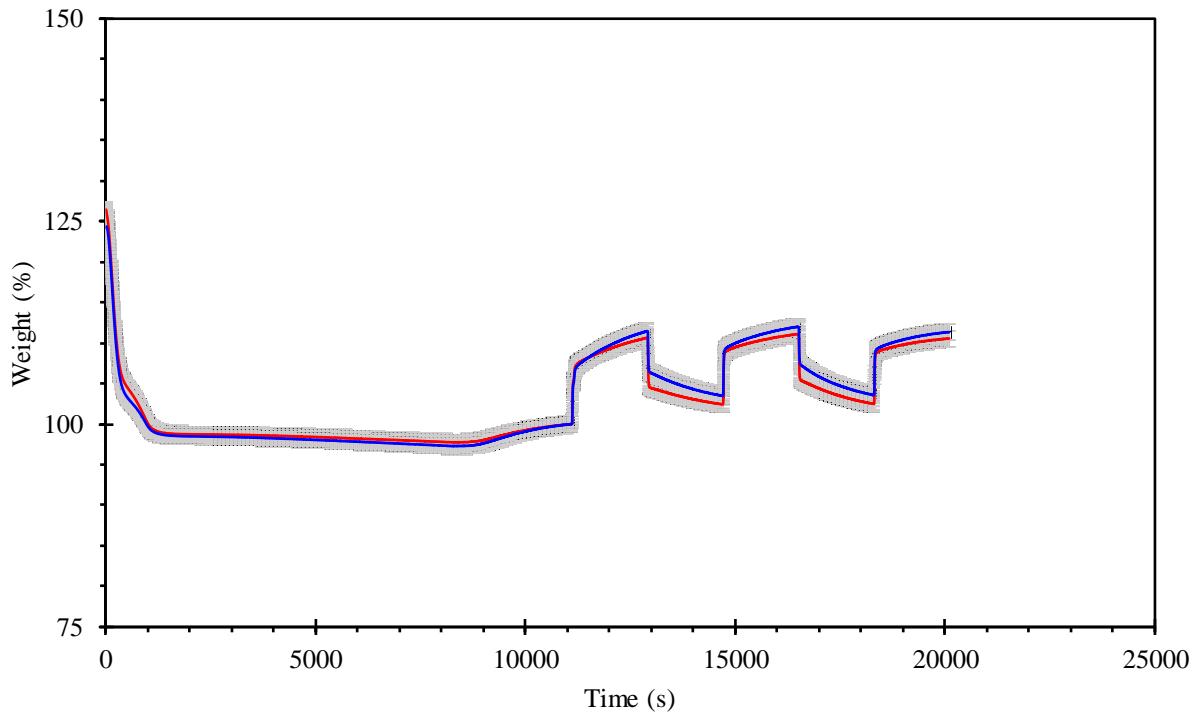

C. Measurement and calculation of  $T_1$  for styrene (measured on a Bruker AVANCE 500MHz spectrometer).

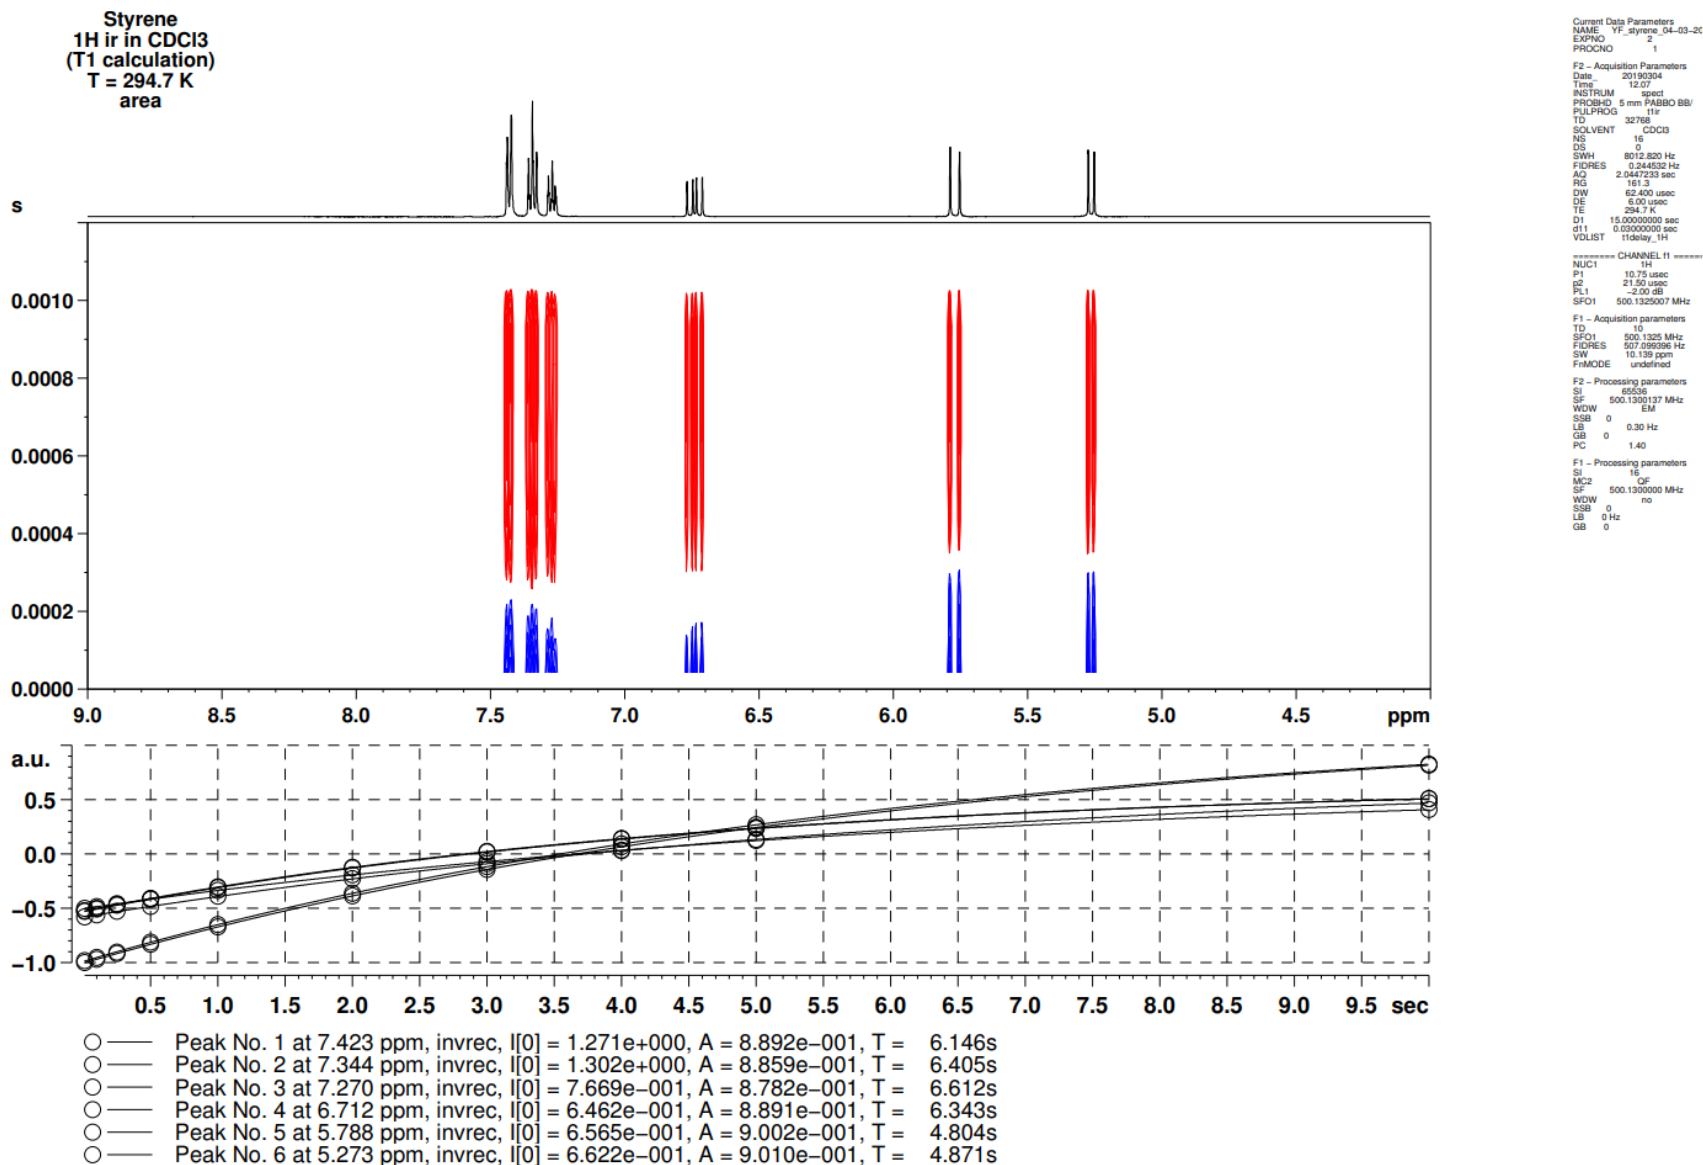

Supplement: RA-010-C9RA10412G-s001.pdf [file RA-010-C9RA10412G-s001.pdf]
